# Supplementary material for: Drought stress in maize causes differential acclimation responses of glutathione and sulfur metabolism in leaves and roots
Source: PubMed Central journal article supplement (PMC5103438; doi:10.1186/s12870-016-0940-z), 2016-11-09
Supplement: 12870_2016_940_MOESM1_ESM.pdf [file 12870_2016_940_MOESM1_ESM.pdf]

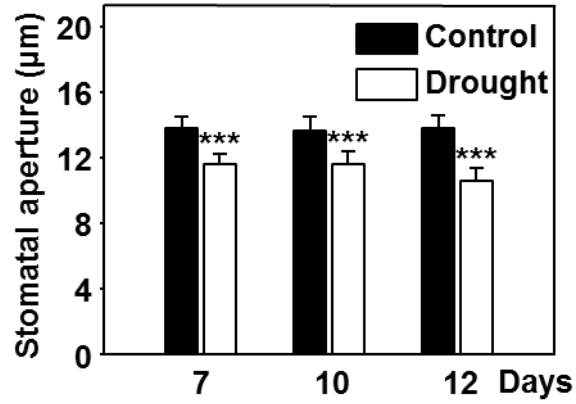

**Supplementary Figure 1. Stomatal aperture of drought stressed maize plants.**

Quantification of stomatal aperture of control (black) and water-restricted (white) maize leaves at indicated time points. Data are means  $\pm$  SD of 35 individual replicates. Asterisks indicates statistical differences as determined by the unpaired t-test (\*,  $0.05 \geq p > 0.01$ ; \*\*,  $0.01 \geq p > 0.001$ ; \*\*\*,  $p \leq 0.001$ ).
