# Supplementary material for: Drought stress in maize causes differential acclimation responses of glutathione and sulfur metabolism in leaves and roots
Source: PubMed Central journal article supplement (PMC5103438; doi:10.1186/s12870-016-0940-z), 2016-11-09
Supplement: 12870_2016_940_MOESM3_ESM.pdf [file 12870_2016_940_MOESM3_ESM.pdf]

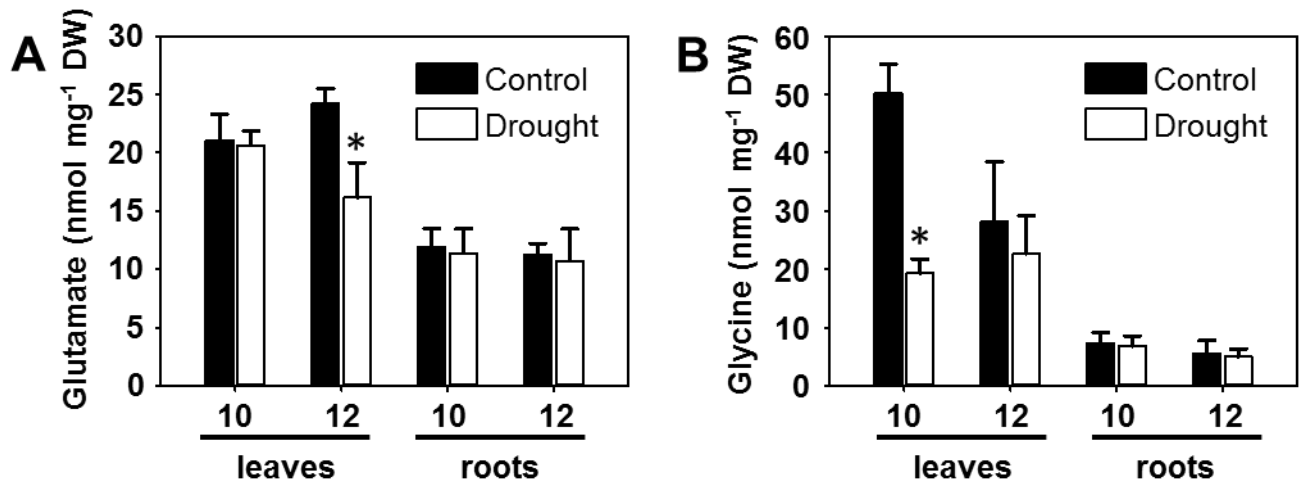

**Supplementary Figure 3: Steady state levels of glutamate and glycine in roots and shoots of drought stressed maize plants**

A-B) Steady state levels of glutamate (A) and glycine (B) in leaves and roots of maize plants with sufficient (black) and restricted (white) water supply. Data are means  $\pm$  SD of five individual replicates. Asterisks indicates statistical differences as determined by the unpaired t-test (\*,  $p \leq 0.05$ )
