# Supplementary material for: Drought stress in maize causes differential acclimation responses of glutathione and sulfur metabolism in leaves and roots
Source: PubMed Central journal article supplement (PMC5103438; doi:10.1186/s12870-016-0940-z), 2016-11-09
Supplement: 12870_2016_940_MOESM4_ESM.pdf [file 12870_2016_940_MOESM4_ESM.pdf]

**Supplementary table 1**

Accession number, genome annotations (<http://www.maizgedb.org/>) and primers used for quantification of transcript steady levels by qRT-PCR of maize genes addressed in this study.

| Gene name               | Accession number | Maize genome annotation | Name of primer               | Sequence                                                |
|-------------------------|------------------|-------------------------|------------------------------|---------------------------------------------------------|
| Actin                   | J01238           | GRMZM2G126010           | Actin_for<br>Actin_rev       | CTCAACCCCAAGGCCAACAGAGAG<br>GGCTCACACCATCACCTGAATCCA    |
| APS reductase           | AJ295032         | -                       | APR_for<br>APR_rev           | GTCCAGGTTGATCCTTCCTT<br>GTCAATGTTGCCCTTGTGGA            |
| ATP sulfurylase 1       | -                | GRMZM2G051270           | ATPS1_for<br>ATPS1_rev       | CAGATGATGTGCCTCTTAGTTGGAG<br>GCATTGGAGAGGGAAAGATCGCAAC  |
| ATP sulfurylase 2       | -                | GRMZM2G158147           | ATPS2_for<br>ATPS2_rev       | TGATACAGTAGCAAAGGAGATGGCC<br>GAAACCGTCTGGAGGATTCTCTCC   |
| ATP sulfurylase 3       | -                | GRMZM2G149952           | ATPS3_for<br>ATPS3_rev       | CCTGTTCTTCTGCTCCATCCACTG<br>CAGTTGATTCTGGGTTGAGGACACC   |
| Glutathione reductase   | AJ006055         | GRMZM2G172322           | GR_for<br>GR_rev             | CATTTGGGCTGTTGGAGATG<br>TGACGTAGCGCACACAAGAA            |
| $\gamma$ -EC synthetase | AJ302783         | GRMZM2G020096           | GSH1_for<br>GSH1_rev         | AGCTTAAGGAGCCATATCTGGACAG<br>GCATAGTCCACATATTGCTCAAACCC |
| SULTR1;1                | AF355602         | GRMZM2G159632           | SULTR1;1_for<br>SULTR1;1_rev | TCCTGGCATTCTTCTGGTT<br>GAGGGCTGCAAATGTTCTTC             |
| SULTR1;2                | EU974789         | GRMZM2G080178           | SULTR1;2_for<br>SULTR1;2_rev | GGCGTGGTTTTCAAGTCTGT<br>ATCTTCTTCGTCCGTCACC             |
| SULTR4;1                | ACG29567         | GRMZM2G068212           | SULTR4;1_for<br>SULTR4;1_rev | CTACATCAAGACAGTTGCGTGAG<br>GTA ACAGGGGACATCTCGAGGATCAC  |
| $\beta$ -tubulin        | L10634           | GRMZM2G043822           | Tub_for<br>Tub_rev           | GATTTGCTCCACTGACCTCGCGG<br>CGGAACATAGCAGATGCCGTGAG      |
